# Supplementary material
Source: PubMed Central journal article supplement (PMC4959163)
Supplement: AEM.00192-16_zam999117179so1.pdf [file AEM.00192-16_zam999117179so1.pdf]

**Table S1.** Description of samples used in this study.

| Collection site (abbreviation)              | Number of sea lion samples | Collection date                          | Sample name            |
|---------------------------------------------|----------------------------|------------------------------------------|------------------------|
| <b><u>South Australia</u></b>               |                            |                                          |                        |
| Blefuscu Is. (BI_SA)                        | 4                          | 8-Jul-2009                               | A27, A28, A29, A31     |
| Lewis Is. (LI_SA)                           | 4                          | 11-Feb-2010                              | A74, A78, A79, A80     |
| Liguanea Is. (LigI_SA)                      | 2                          | 5-May-2009                               | A90, A93               |
| Lilliput Is. (LilI_SA)                      | 4                          | 22-Jun-2009                              | A120, A122, A123, A124 |
| Olive Is. (OI_SA)                           | 3                          | 1-Sept-2010                              | A187, A188, A189       |
| West Waldegrave Is. (WWI_SA)                | 2                          | 21-May-2009                              | A235, A243             |
| <b><u>South Australia: Kangaroo Is.</u></b> |                            |                                          |                        |
| Cape Gantheaume (CG_KI)                     | 3                          | 18-Mar-2009                              | A40, A41, A44          |
| Seal Bay (SB_KI)                            | 2                          | 16-Mar-2009                              | A203, A206             |
| Seal Slide (SS_KI)                          | 4                          | 23-Jul-2009                              | A230, A231, A232, A233 |
| <b><u>Western Australia</u></b>             |                            |                                          |                        |
| Beagle Is. (BI_WA)                          | 2                          | 16-Mar-2010                              | A12, A15               |
| North Fishermans Is. (NFI_WA)               | 3                          | 18-Mar-2009                              | A50, A51, A52          |
| <b><u>Captive</u></b>                       |                            |                                          |                        |
| Dolphin Marine Magic (NSW) (DMM_Cap)        | 5                          | 24-Mar-2011                              | P7, P9, P10, P11, P12  |
| Sea World (QLD) (SW_Cap)                    | 3                          | 22-May-2013, 4-April-2013, 17-April-2013 | S1, S4, S6             |
| Taronga Zoo (NSW) (TZ_Cap)                  | 2                          | 2-May-2013                               | T1, T2                 |
